# Supplementary material for: Influence of shell thickness on the refractive index sensitivity of localized surface plasmon resonance inflection points in silver-coated gold nanorods
Source: Royal Society of Chemistry journal article supplement (doi:10.1039/d0ra02691c), 2020-01-01
Supplement: d0ra02691c1.pdf [file d0ra02691c1.pdf]

## **Electronic Supplementary Information**

### **Influence of Shell Thickness on the Refractive Index Sensitivity of Localized Surface Plasmon Resonance Inflection Points in Silver-Coated Gold Nanorods**

Kyeong Rim Ryu<sup>a</sup> and Ji Won Ha<sup>a,b\*</sup>

<sup>a</sup>Advanced Nano-Bio-Imaging and Spectroscopy Laboratory, Department of Chemistry,  
University of Ulsan, 93 Daehak-ro, Nam-gu, Ulsan 44610, Republic of Korea

<sup>b</sup>Energy Harvest-Storage Research Center (EHSRC), University of Ulsan, 93 Daehak-ro, Nam-gu, Ulsan 44610, Republic of Korea

\*To whom correspondence should be addressed.

**J. W. Ha**

Phone: +82-52-712-8012

Fax: +82-52-712-8003

E-mail: jwha77@ulsan.ac.kr

This document contains supplementary figures (Figure S1 to S6) and tables (Table S1 to S6).

## Supplementary Figures

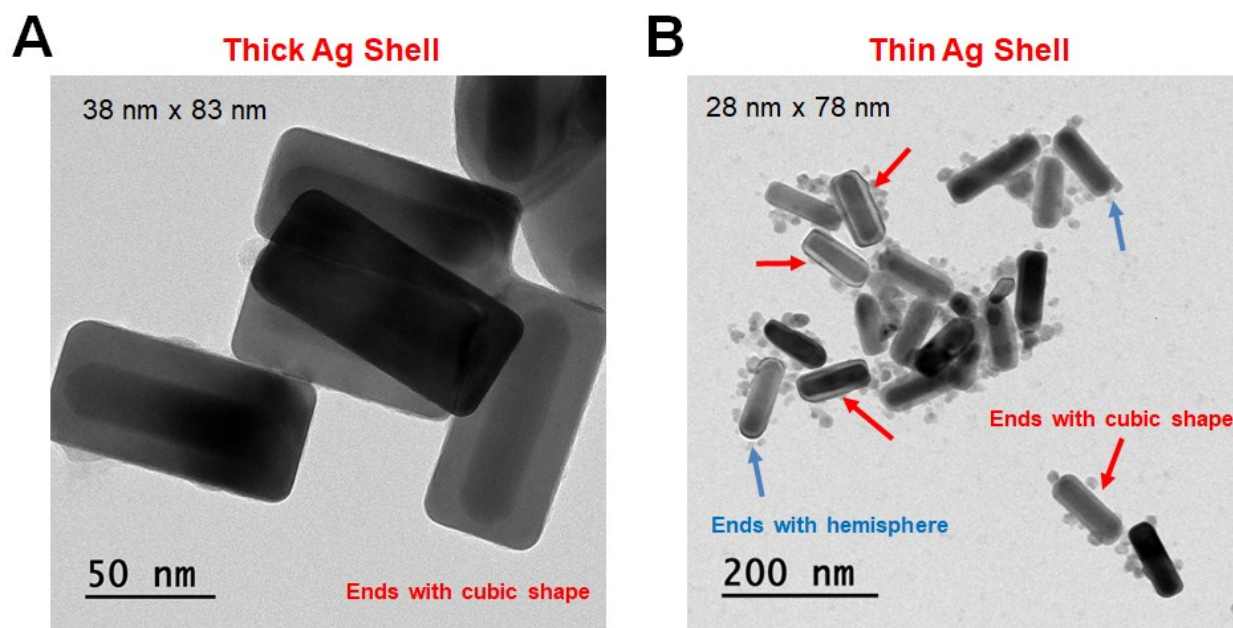

**Fig. S1 (A)** TEM image of single Ag@AuNRs with thick shell thickness, and they had a cubic shape at the ends. **(B)** TEM image of single Ag@AuNRs with thin shell thickness. Some of thin Ag@AuNRs have a cubic shape at the ends (indicated by red-arrow), whereas some of thin Ag@AuNRs have a shape of hemisphere at the ends (indicated by blue-arrow). But, from a TEM analysis using many particles, we found that a majority of thin Ag@AuNRs had the cubic shape at their ends.

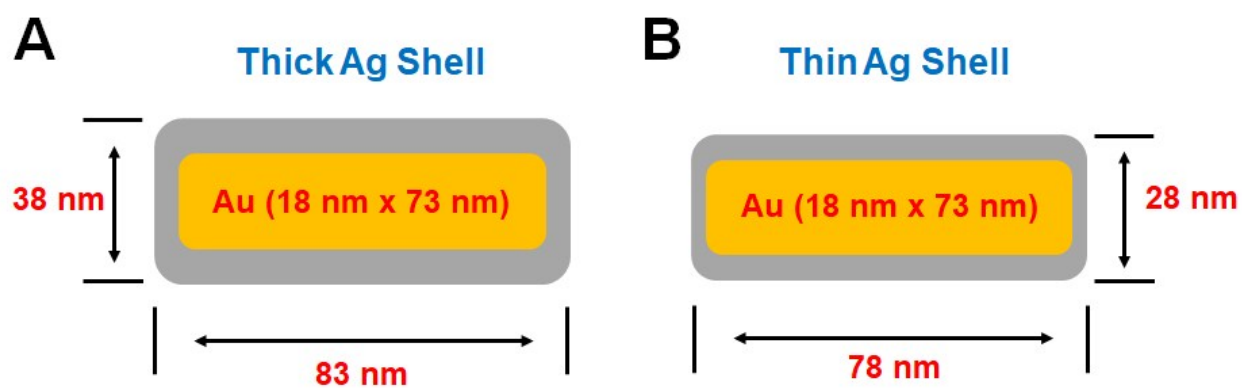

**Fig. S2** Schematics to show the size and dimensions of Ag@AuNRs with two different Ag shell thickness. **(A)** Dimension of Ag@AuNR with thick Ag shell thickness at the same size of AuNR core. **(B)** Dimension of Ag@AuNR with thin shell thickness at the same size of AuNR core.

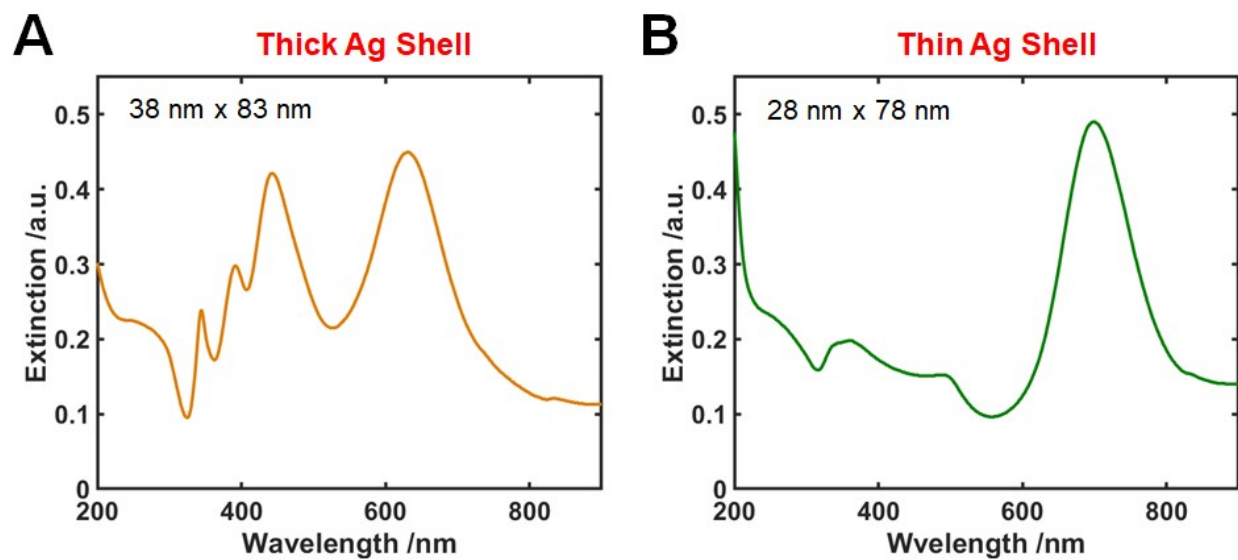

**Fig. S3** UV-Vis extinction spectra of Ag@AuNRs with thick Ag shell in water (**A**) and Ag@AuNRs with thin Ag shell dispersed in water (**B**).

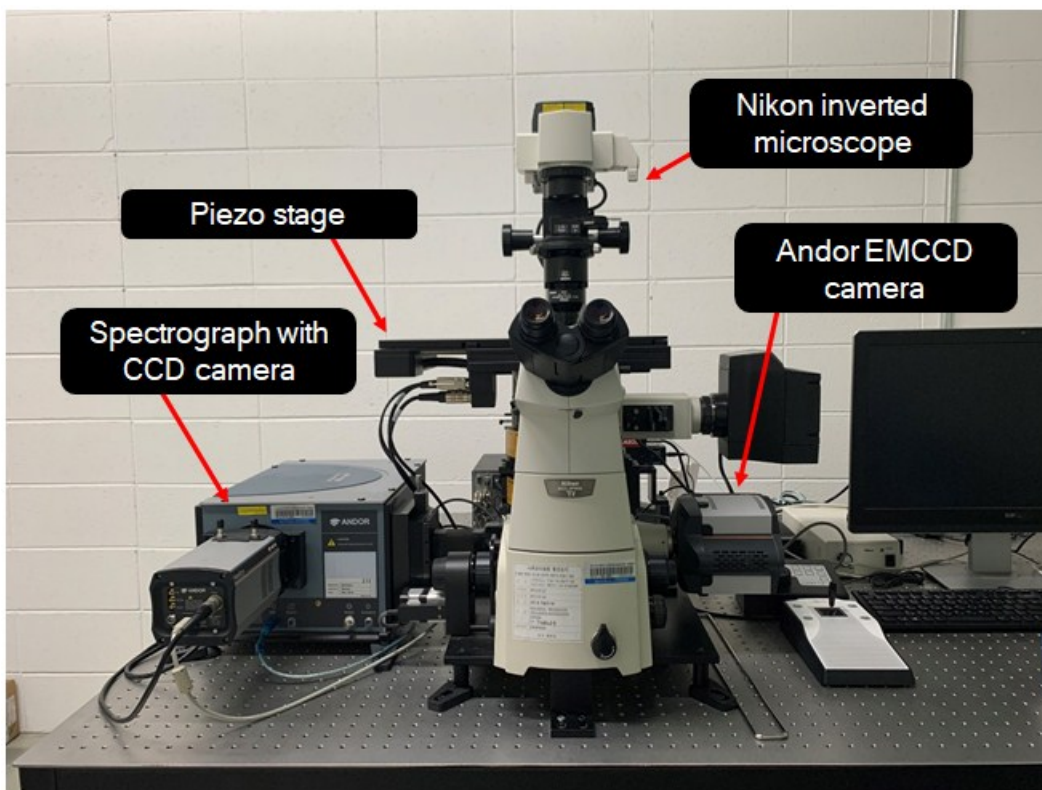

**Fig. S4** A photograph to show the experimental setup for single particle DF microscopy and spectroscopy.

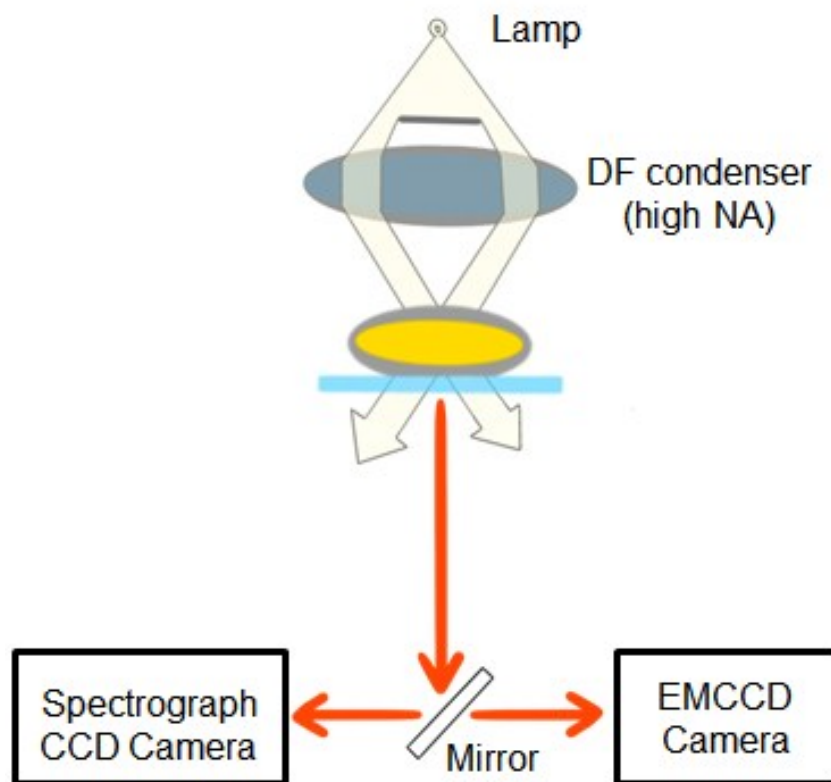

**Fig. S5** Schematic depicting the working principle of scattering-based DF microscopy and spectroscopy.

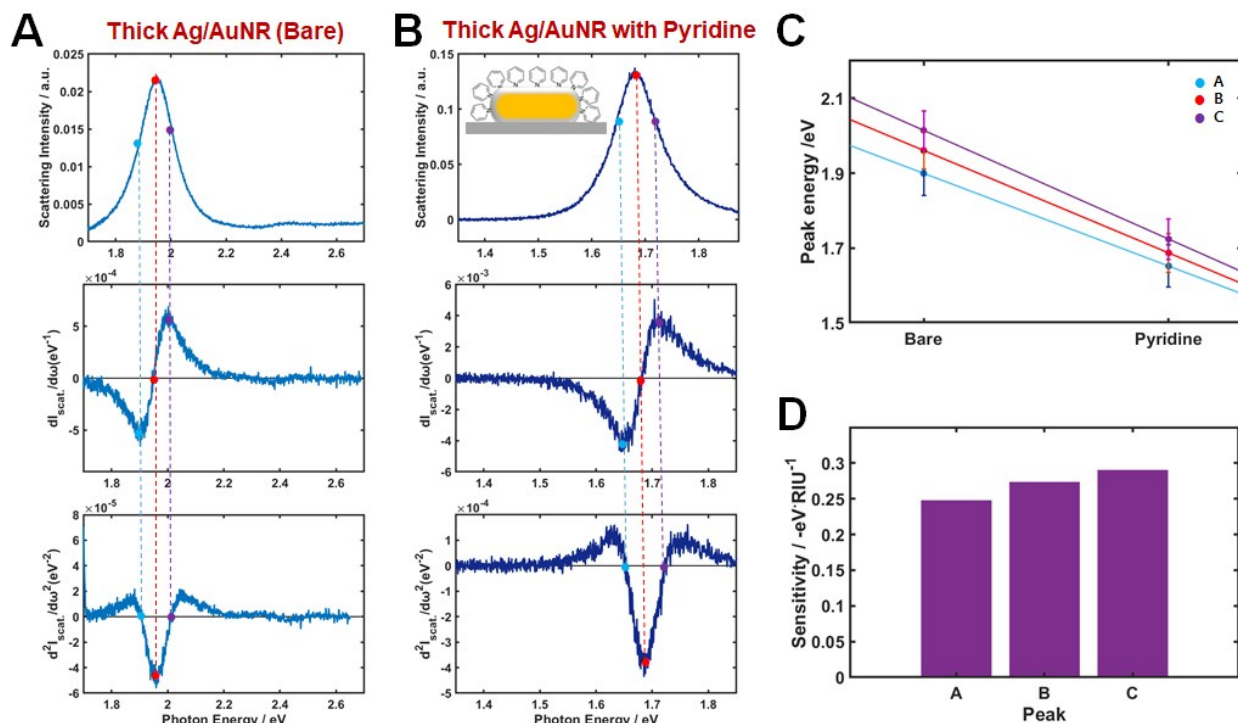

**Fig. S6** Inflection point method for single particle LSPR scattering sensing with thick Ag@AuNRs in the presence of pyridine molecules as adsorbate. Pyridine molecules are effectively adsorbed on the Ag surfaces through Ag-nitrogen interaction. **(A, B)** LSPR scattering efficiencies (first row), LSPR scattering efficiencies first order derivatives (second row), and LSPR scattering efficiencies second order derivatives (third row). **(C)** Change in the peak energy upon the adsorption of pyridine molecules on the Ag surfaces. **(D)** Sensitivity of the pyridine adsorption on Peak shifts A, B and C.

## Supplementary Tables

| Thick Ag shell    | 1      | 2      | 3      | 4      | 5      | 6      | 7      | 8      | 9      | 10     | Ave           | Std    |
|-------------------|--------|--------|--------|--------|--------|--------|--------|--------|--------|--------|---------------|--------|
| Inflection A (eV) | 2.1145 | 2.175  | 2.0987 | 2.0377 | 2.2192 | 2.087  | 2.2392 | 2.1761 | 2.1771 | 2.1531 | <b>2.1477</b> | 0.0625 |
| LSPR B (eV)       | 2.1729 | 2.2392 | 2.1624 | 2.0997 | 2.2768 | 2.1635 | 2.3121 | 2.2448 | 2.2336 | 2.2148 | <b>2.212</b>  | 0.0628 |
| Inflection C (eV) | 2.2392 | 2.3014 | 2.2358 | 2.1814 | 2.3411 | 2.2493 | 2.3899 | 2.3338 | 2.3014 | 2.2756 | <b>2.285</b>  | 0.0612 |

**Table S1.** Inflection points and LSPR peak locations on the curvatures of single Ag@AuNRs with thick Ag shell thickness in refractive index of air

| Thick Ag shell    | 1      | 2      | 3      | 4      | 5      | 6      | 7      | 8      | 9      | 10     | Ave          | Std    |
|-------------------|--------|--------|--------|--------|--------|--------|--------|--------|--------|--------|--------------|--------|
| Inflection A (eV) | 1.9097 | 1.9376 | 1.9759 | 1.8493 | 1.9105 | 1.8373 | 1.9351 | 1.9326 | 1.9376 | 1.9418 | <b>1.917</b> | 0.0429 |
| LSPR B (eV)       | 1.9681 | 1.9872 | 2.047  | 1.8817 | 1.9604 | 1.8739 | 2.0148 | 2.005  | 2.0121 | 1.9952 | <b>1.975</b> | 0.0566 |
| Inflection C (eV) | 2.023  | 2.0554 | 2.1175 | 1.9301 | 2.0112 | 1.9219 | 2.0802 | 2.062  | 2.085  | 2.062  | <b>2.035</b> | 0.0647 |

**Table S2.** Inflection points and LSPR peak locations on the curvatures of single Ag@AuNRs with thick shell thickness in refractive index of water

| Thick Ag shell    | 1      | 2      | 3      | 4      | 5      | 6      | 7      | 8      | 9      | 10     | Ave          | Std    |
|-------------------|--------|--------|--------|--------|--------|--------|--------|--------|--------|--------|--------------|--------|
| Inflection A (eV) | 1.7411 | 1.7622 | 1.7547 | 1.7213 | 1.7923 | 1.7391 | 1.8657 | 1.7795 | 1.8175 | 1.8565 | <b>1.783</b> | 0.0497 |
| LSPR B (eV)       | 1.8117 | 1.8212 | 1.8161 | 1.7958 | 1.8649 | 1.8059 | 1.9247 | 1.8481 | 1.8955 | 1.9247 | <b>1.851</b> | 0.0492 |
| Inflection C (eV) | 1.8821 | 1.89   | 1.8734 | 1.8665 | 1.9397 | 1.8711 | 1.9816 | 1.9363 | 1.96   | 1.9859 | <b>1.919</b> | 0.0473 |

**Table S3.** Inflection points and LSPR peak locations on the curvatures of single Ag@AuNRs with thick shell thickness in refractive index of oil

| Thin Ag shell     | 1      | 2      | 3      | 4      | 5      | 6      | 7      | 8      | 9      | 10    | Ave          | Std    |
|-------------------|--------|--------|--------|--------|--------|--------|--------|--------|--------|-------|--------------|--------|
| Inflection A (eV) | 1.8576 | 1.9244 | 1.9452 | 1.9865 | 1.7862 | 1.8692 | 1.8584 | 1.7176 | 1.7855 | 1.856 | <b>1.859</b> | 0.0857 |
| LSPR B (eV)       | 1.8944 | 1.97   | 1.9839 | 2.0314 | 1.8305 | 1.9056 | 1.9129 | 1.7529 | 1.8194 | 1.902 | <b>1.9</b>   | 0.0883 |
| Inflection C (eV) | 1.9327 | 2.0114 | 2.0205 | 2.0804 | 1.8754 | 1.9385 | 1.9725 | 1.7883 | 1.8569 | 1.938 | <b>1.942</b> | 0.0911 |

**Table S4.** Inflection points and LSPR peak locations on the curvatures of single Ag@AuNRs with thin Ag shell thickness in refractive index of air

| Thin Ag shell     | 1      | 2      | 3      | 4      | 5      | 6      | 7      | 8      | 9      | 10     | Ave          | Std    |
|-------------------|--------|--------|--------|--------|--------|--------|--------|--------|--------|--------|--------------|--------|
| Inflection A (eV) | 1.7536 | 1.7347 | 1.7228 | 1.7314 | 1.7414 | 1.7189 | 1.7287 | 1.7597 | 1.738  | 1.7215 | <b>1.735</b> | 0.0135 |
| LSPR B (eV)       | 1.7912 | 1.7652 | 1.7618 | 1.775  | 1.775  | 1.7502 | 1.7583 | 1.7933 | 1.7604 | 1.7583 | <b>1.768</b> | 0.0144 |
| Inflection C (eV) | 1.8128 | 1.8005 | 1.8005 | 1.8334 | 1.8297 | 1.7834 | 1.8019 | 1.8267 | 1.8019 | 1.7869 | <b>1.807</b> | 0.0174 |

**Table S5.** Inflection points and LSPR peak locations on the curvatures of single Ag@AuNRs with thin shell thickness in refractive index of water

| Thin Ag shell     | 1      | 2      | 3      | 4      | 5      | 6      | 7      | 8      | 9      | 10     | Ave          | Std    |
|-------------------|--------|--------|--------|--------|--------|--------|--------|--------|--------|--------|--------------|--------|
| Inflection A (eV) | 1.7577 | 1.6571 | 1.6912 | 1.7354 | 1.7228 | 1.7117 | 1.6718 | 1.7515 | 1.6887 | 1.6995 | <b>1.709</b> | 0.0333 |
| LSPR B (eV)       | 1.799  | 1.6925 | 1.7195 | 1.7625 | 1.7495 | 1.7461 | 1.7001 | 1.7813 | 1.7143 | 1.7287 | <b>1.739</b> | 0.0348 |
| Inflection C (eV) | 1.8402 | 1.7314 | 1.7549 | 1.7983 | 1.789  | 1.7827 | 1.7354 | 1.8201 | 1.7481 | 1.7652 | <b>1.776</b> | 0.0361 |

**Table S6.** Inflection points and LSPR peak locations on the curvatures of single Ag@AuNRs with thin shell thickness in refractive index of oil
